# Supplementary material
Source: Springer Nature journal article supplement (https://www.springermedizin.de/resource/supplementary/12889_2006_470_MOESM2_ESM.pdf/9500940)

|        | Under-five Population | U5MR | Proportion of deaths |
|--------|-----------------------|------|----------------------|
| Coast  | 1,430,809             | 40,4 | 33,12%               |
| Andean | 1,262,714             | 72,5 | 52,45%               |
| Jungle | 389,121               | 64,7 | 14,43%               |

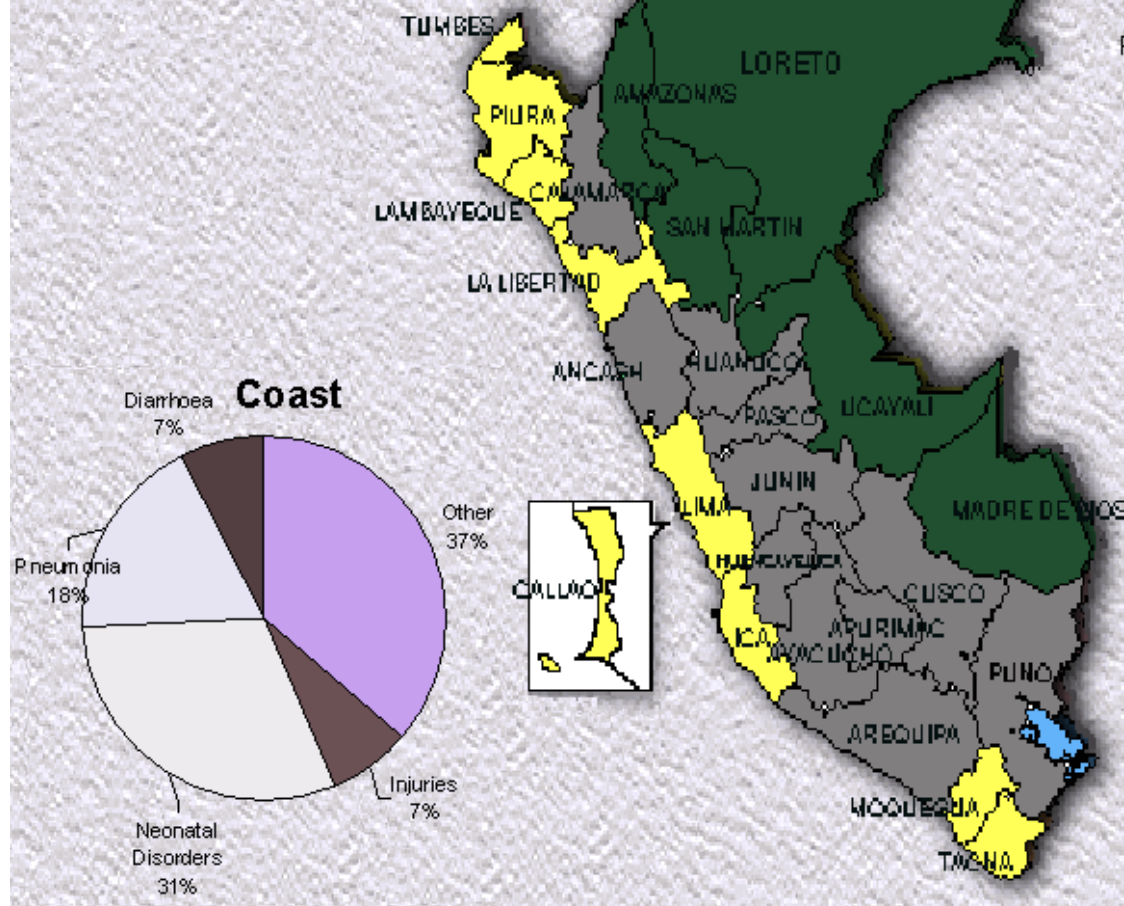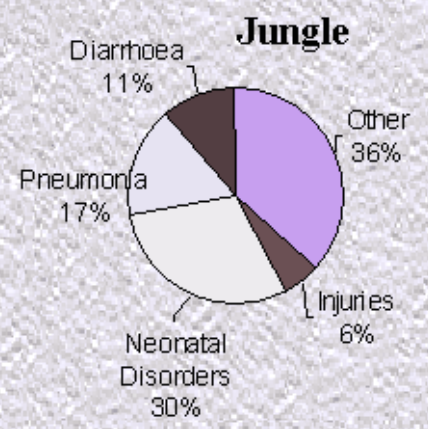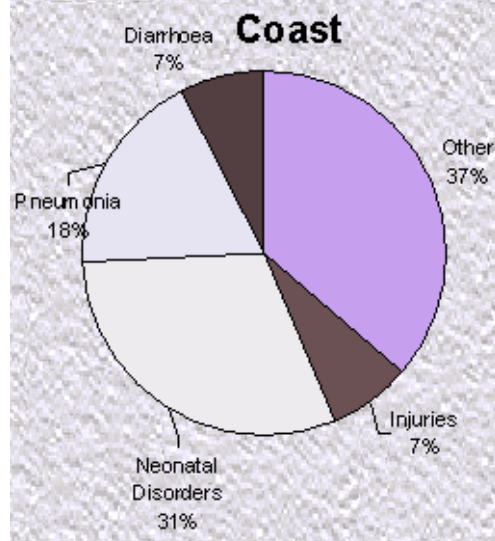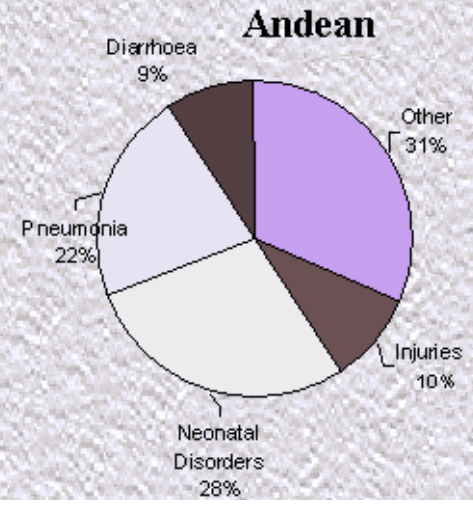

Supplement: MOESM2 [file 9500940]
